# Supplementary material for: Bicyclic Engineered Sortase A Performs Transpeptidation under Denaturing Conditions
Source: PubMed Central journal article supplement (PMC10288436; doi:10.1021/acs.bioconjchem.3c00151), 2023-05-29
Supplement: bc3c00151_si_001.pdf [file bc3c00151_si_001.pdf]

## Supplementary Information

### **Bicyclic engineered Sortase A performs transpeptidation under denaturing conditions**

Sebastian Kiehstaller,<sup>1</sup> George H. Hutchins,<sup>2,3</sup> Alessia Amore,<sup>2,3</sup> Alan Gerber,<sup>2,3</sup> Mohamed Ibrahim,<sup>2</sup> Sven Hennig,<sup>2,3</sup> Saskia Neubacher,<sup>1,\*</sup> Tom N. Grossmann<sup>2,3,\*</sup>

<sup>1</sup> Incircular BV, De Boelelaan 1108, 1081 HZ Amsterdam, The Netherlands.

<sup>2</sup> Department of Chemistry & Pharmaceutical Sciences, Vrije Universiteit Amsterdam, De Boelelaan 1083, 1081 HV, Amsterdam, The Netherlands.

<sup>3</sup> Amsterdam Institute of Molecular and Life Sciences, Vrije Universiteit Amsterdam, De Boelelaan 1083, 1081 HV, Amsterdam, The Netherlands.

\* corresponding authors, emails: [saskia@incircular.com](mailto:saskia@incircular.com), [t.n.grossmann@vu.nl](mailto:t.n.grossmann@vu.nl)

## Supplementary Figures

```
60          70          80          90          100         110
SrtA      QAKPQIPKDKSKVAGYIEIPDADIKEPVYPGPATPEQLNRGVSFAEENESLDDQNISIAG
8M        QAKPQIPKDKSKVAGYIEIPDADIKEPVYPGPATREQLNRGVSFAEENESLDDQNISIAG
xS11      QAKPQIPKDKSKVAGYIEIPDADIKEPVYPGPATREQLNRGVSFAEENESLCDQNISIAG

120        130        140        150        160        170
HTFIDRPNYQFTNLKAAKKGSMVYFKVGNETRKYKMTSIRDVKPTDVGVLDEQKGKDKQL
HTFIGRPNYQFTNLKAAKKGSMVYFKVGNETRKYKMTSIRNVKPTAVGVVLDEQKGKDKQL
HTFIGRPNYQFTNLKAAKKGSMVYFKVGNCTRKYKMTSIRNVKPTAVGVVLDEQKGKCQL

180        190        200
TLITCDDYNEKTGVWEKRKIFVATEVK
TLITCDDLNRETGVWETRKIFVATEVK
TLITCDDLNRETGVWETRKIFVATEVK
```

**Figure S1:** Amino acid sequence alignment of **SrtA**, **8M** and **S11** from residue 60 – 206. The eight activity enhancing residues are indicated in blue, and the three additional introduced cysteines for crosslinking in red.

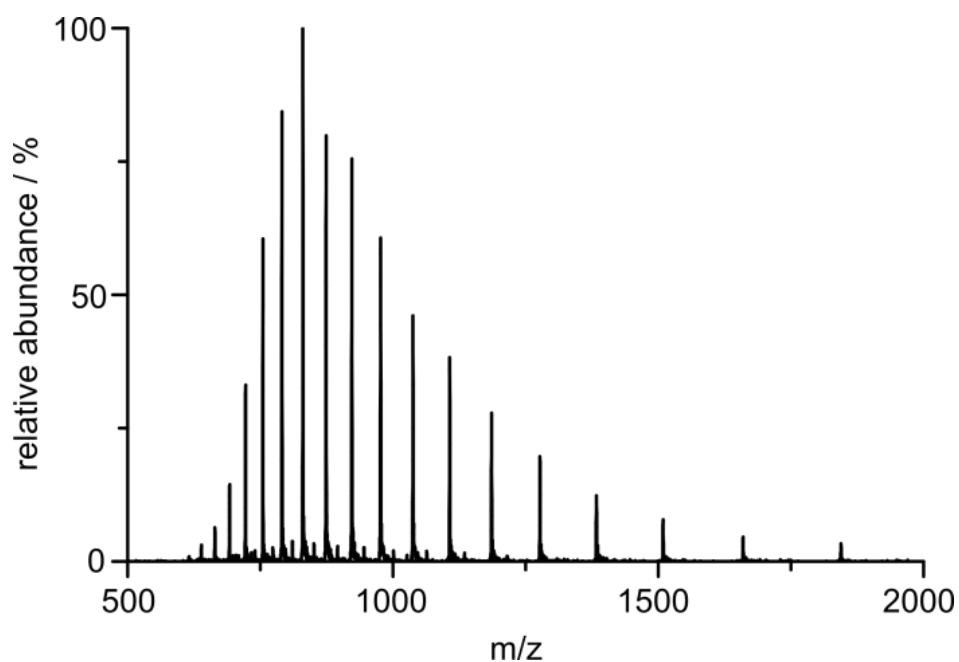

MW (**S11**):      calculated = 16594.98 Da  
                       found = 16593.09 Da (deconvolution)

|                 | m/z<br>calculated | m/z<br>found |
|-----------------|-------------------|--------------|
| $[M+11H]^{+11}$ | 1509.63           | 1509.4       |
| $[M+12H]^{+12}$ | 1383.92           | 1384.0       |
| $[M+13H]^{+13}$ | 1277.54           | 1277.4       |
| $[M+14H]^{+14}$ | 1186.36           | 1186.3       |
| $[M+15H]^{+15}$ | 1107.33           | 1107.3       |
| $[M+16H]^{+16}$ | 1038.19           | 1038.1       |
| $[M+17H]^{+17}$ | 977.18            | 977.1        |
| $[M+18H]^{+18}$ | 922.94            | 922.9        |
| $[M+19H]^{+19}$ | 874.42            | 874.4        |
| $[M+20H]^{+20}$ | 830.75            | 830.7        |
| $[M+21H]^{+21}$ | 791.24            | 791.2        |
| $[M+22H]^{+22}$ | 755.32            | 755.2        |
| $[M+23H]^{+23}$ | 722.52            | 722.5        |
| $[M+24H]^{+24}$ | 692.46            | 692.4        |
| $[M+25H]^{+25}$ | 664.80            | 664.9        |

**Figure S2:** MS spectrum of **S11** including calculated and found m/z signals.

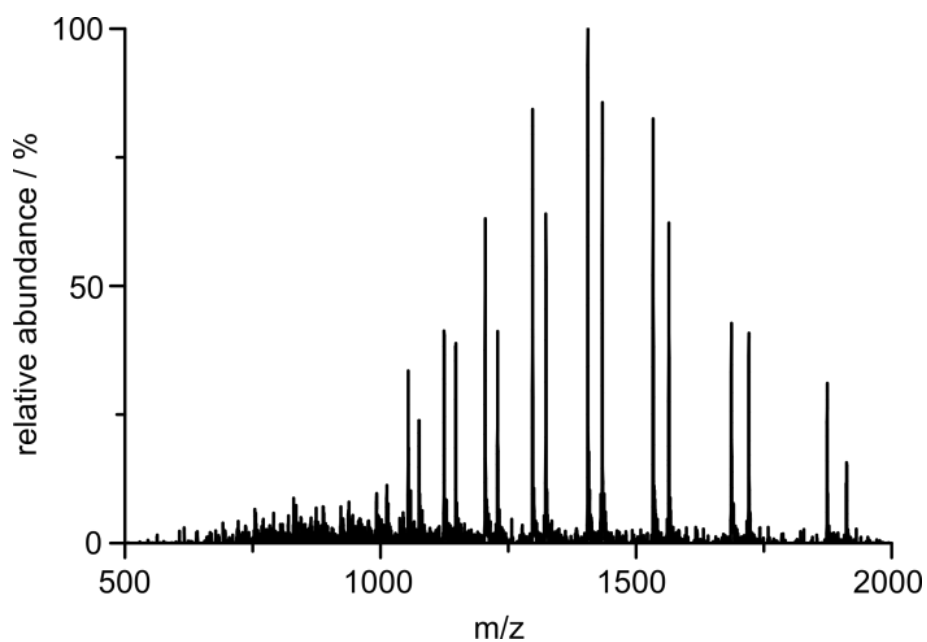

MW(**xS11**):    calculated = 16861.33 Da  
                   found = 16859.18 Da (deconvolution)

MW(**oS11**):    calculated = 17200.33 Da  
                   found = 17198.92 Da (deconvolution)

|                        | <b>xS11</b>       |              | <b>oS11</b>       |              |
|------------------------|-------------------|--------------|-------------------|--------------|
|                        | m/z<br>calculated | m/z<br>found | m/z<br>calculated | m/z<br>found |
| [M+9H] <sup>+9</sup>   | 1874.48           | 1874.4       | 1912.15           | 1911.5       |
| [M+10H] <sup>+10</sup> | 1687.13           | 1686.8       | 1721.03           | 1720.9       |
| [M+11H] <sup>+11</sup> | 1533.85           | 1533.6       | 1564.67           | 1564.5       |
| [M+12H] <sup>+12</sup> | 1406.11           | 1405.9       | 1434.36           | 1434.3       |
| [M+13H] <sup>+13</sup> | 1298.03           | 1297.9       | 1324.10           | 1324.0       |
| [M+14H] <sup>+14</sup> | 1205.38           | 1205.2       | 1229.60           | 1229.5       |
| [M+15H] <sup>+15</sup> | 1125.09           | 1124.9       | 1147.6            | 1147.4       |
| [M+16H] <sup>+16</sup> | 1054.83           | 1054.5       | 1076.02           | 1075.8       |

**Figure S3:** MS spectrum of reaction of **S11** with Ae2 in the presence of CaCl<sub>2</sub> including calculated and found m/z signals.

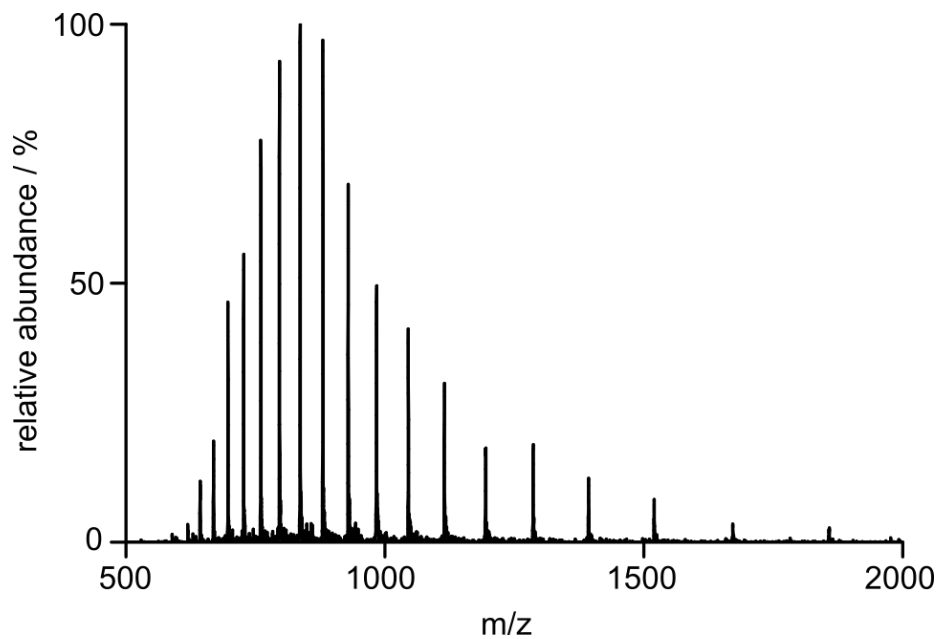

MW(**8M**-IAA): calculated = 16715.01 Da  
 found = 16713.50 Da (deconvolution)

|                        | m/z<br>calculated | m/z<br>found |
|------------------------|-------------------|--------------|
| [M+11H] <sup>+11</sup> | 1520.55           | 1520.6       |
| [M+12H] <sup>+12</sup> | 1393.92           | 1393.9       |
| [M+13H] <sup>+13</sup> | 1286.77           | 1286.8       |
| [M+14H] <sup>+14</sup> | 1194.93           | 1194.6       |
| [M+15H] <sup>+15</sup> | 1115.33           | 1115.2       |
| [M+16H] <sup>+16</sup> | 1045.69           | 1045.6       |
| [M+17H] <sup>+17</sup> | 984.24            | 984.2        |
| [M+18H] <sup>+18</sup> | 929.61            | 929.5        |
| [M+19H] <sup>+19</sup> | 880.74            | 880.7        |
| [M+20H] <sup>+20</sup> | 836.75            | 836.7        |
| [M+21H] <sup>+21</sup> | 796.95            | 796.9        |
| [M+22H] <sup>+22</sup> | 760.77            | 760.8        |
| [M+23H] <sup>+23</sup> | 727.74            | 727.6        |
| [M+24H] <sup>+24</sup> | 697.46            | 697.2        |
| [M+25H] <sup>+25</sup> | 669.60            | 669.7        |
| [M+26H] <sup>+26</sup> | 643.89            | 643.5        |

**Figure S4:** MS spectrum of **8M** after treatment with iodoacetamide (IAA). Deconvolution shows **8M** reacting with one molecule IAA. MS-Chromatograms including calculated and found m/z signals.

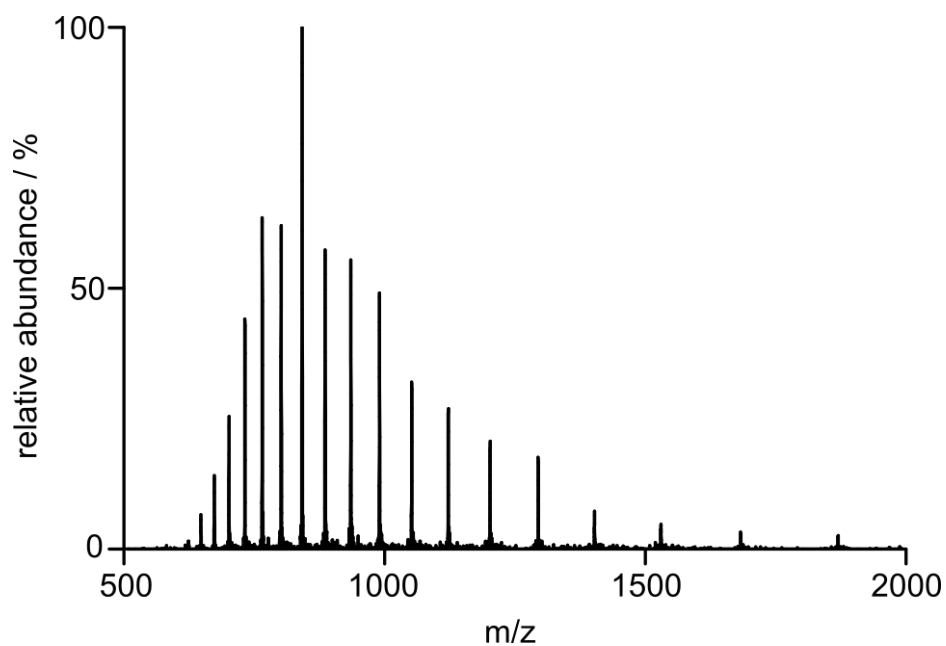

MW(**S11**-(4xIAA)):      calculated = 16823.26 Da  
                                          found = 16820.92 Da (deconvolution)

|                        | m/z<br>calculated | m/z<br>found |
|------------------------|-------------------|--------------|
| [M+12H] <sup>+12</sup> | 1402.94           | 1402.9       |
| [M+13H] <sup>+13</sup> | 1295.10           | 1294.9       |
| [M+14H] <sup>+14</sup> | 1202.66           | 1202.6       |
| [M+15H] <sup>+15</sup> | 1122.55           | 1122.5       |
| [M+16H] <sup>+16</sup> | 1052.45           | 1052.4       |
| [M+17H] <sup>+17</sup> | 990.60            | 990.6        |
| [M+18H] <sup>+18</sup> | 935.63            | 935.5        |
| [M+19H] <sup>+19</sup> | 886.43            | 886.3        |
| [M+20H] <sup>+20</sup> | 842.16            | 842.1        |
| [M+21H] <sup>+21</sup> | 802.11            | 802.0        |
| [M+22H] <sup>+22</sup> | 765.69            | 765.6        |
| [M+23H] <sup>+23</sup> | 732.45            | 732.4        |
| [M+24H] <sup>+24</sup> | 701.97            | 701.9        |
| [M+25H] <sup>+25</sup> | 673.93            | 673.8        |
| [M+26H] <sup>+26</sup> | 648.05            | 648.0        |

**Figure S5:** MS spectrum of **S11** after treatment with iodoacetamide (IAA). Deconvolution shows **S11** reacting with 4 molecules of IAA. MS-Chromatograms including calculated and found m/z signals.

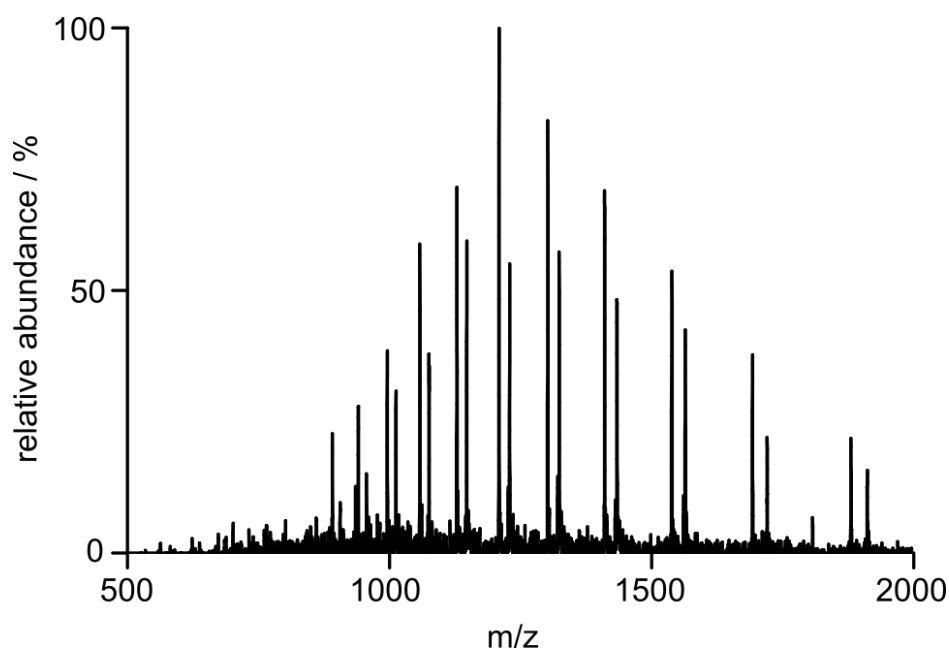

MW(**xS11**-IAA):           calculated = 16918.40 Da  
                                           found = 16916.44 Da (deconvolution)

MW(**oS11**):                    calculated = 17200.33 Da  
                                           found = 17198.77 Da (deconvolution)

|                        | <b>xS11-IAA</b>   |              | <b>oS11</b>       |              |
|------------------------|-------------------|--------------|-------------------|--------------|
|                        | m/z<br>calculated | m/z<br>found | m/z<br>calculated | m/z<br>found |
| [M+9H] <sup>+9</sup>   | 1880.82           | 1880.6       | 1912.15           | 1911.9       |
| [M+10H] <sup>+10</sup> | 1692.84           | 1692.7       | 1721.03           | 1720.8       |
| [M+11H] <sup>+11</sup> | 1539.04           | 1639.1       | 1564.67           | 1564.7       |
| [M+12H] <sup>+12</sup> | 1410.87           | 1410.6       | 1434.36           | 1434.1       |
| [M+13H] <sup>+13</sup> | 1302.42           | 1302.3       | 1324.10           | 1324.0       |
| [M+14H] <sup>+14</sup> | 1209.46           | 1209.3       | 1229.60           | 1229.4       |
| [M+15H] <sup>+15</sup> | 1128.89           | 1128.7       | 1147.6            | 1147.7       |
| [M+16H] <sup>+16</sup> | 1058.40           | 1058.2       | 1076.02           | 1076.1       |
| [M+17H] <sup>+17</sup> | 996.20            | 996.1        | 1012.78           | 1012.5       |
| [M+18H] <sup>+18</sup> | 940.91            | 940.9        | 956.57            | 956.4        |
| [M+19H] <sup>+19</sup> | 891.44            | 891.4        | 906.28            | 906.3        |

**Figure S6:** MS spectrum of a mixture of **oS11** and **xS11** after treatment with iodoacetamide (IAA). Deconvolution shows **xS11** with one molecule IAA, while **oS11** does not react with IAA. MS-Chromatograms including calculated and found m/z signals.

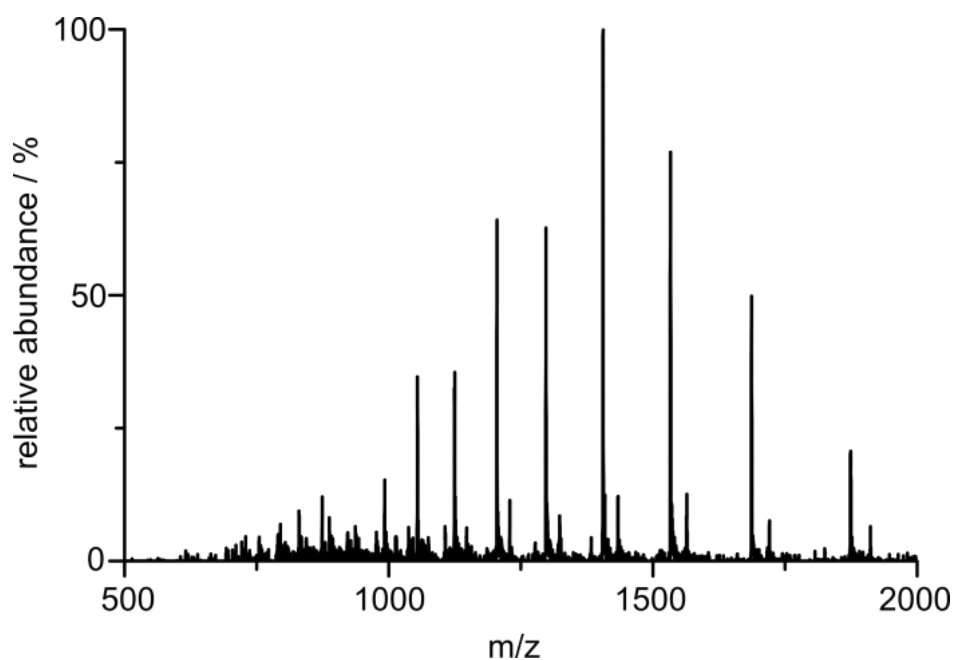

MW(**xS11**):    calculated = 16861.33 Da  
                   found = 16859.18 Da (deconvolution)

MW(**oS11**):    calculated = 17200.33 Da  
                   found = 17198.50 Da (deconvolution)

|                 | <b>xS11</b>       |              | <b>oS11</b>       |              |
|-----------------|-------------------|--------------|-------------------|--------------|
|                 | m/z<br>calculated | m/z<br>found | m/z<br>calculated | m/z<br>found |
| $[M+10H]^{+10}$ | 1687.13           | 1686.8       | 1721.03           | 1721.0       |
| $[M+11H]^{+11}$ | 1533.85           | 1533.7       | 1564.67           | 1564.6       |
| $[M+12H]^{+12}$ | 1406.11           | 1405.9       | 1434.36           | 1434.4       |
| $[M+13H]^{+13}$ | 1298.03           | 1297.9       | 1324.10           | 1323.9       |
| $[M+14H]^{+14}$ | 1205.38           | 1205.5       | 1229.60           | 1229.4       |
| $[M+15H]^{+15}$ | 1125.09           | 1124.8       | 1147.6            | 1147.6       |
| $[M+16H]^{+16}$ | 1054.83           | 1054.7       |                   |              |
| $[M+17H]^{+17}$ | 992.84            | 992.7        |                   |              |

**Figure S7:** MS spectrum of reaction of **S11** with Ae2 in the absence of CaCl<sub>2</sub> including calculated and found m/z signals.



biotin-PEG<sub>3</sub>-Cys (**B3C**)

MW = 549.70 Da

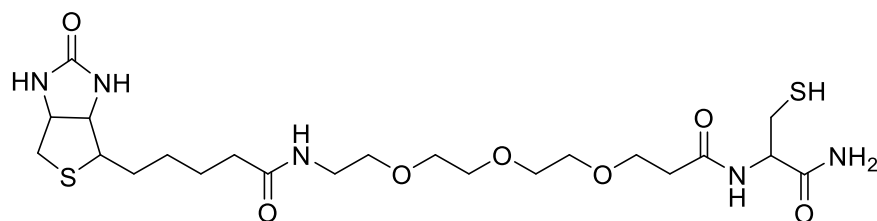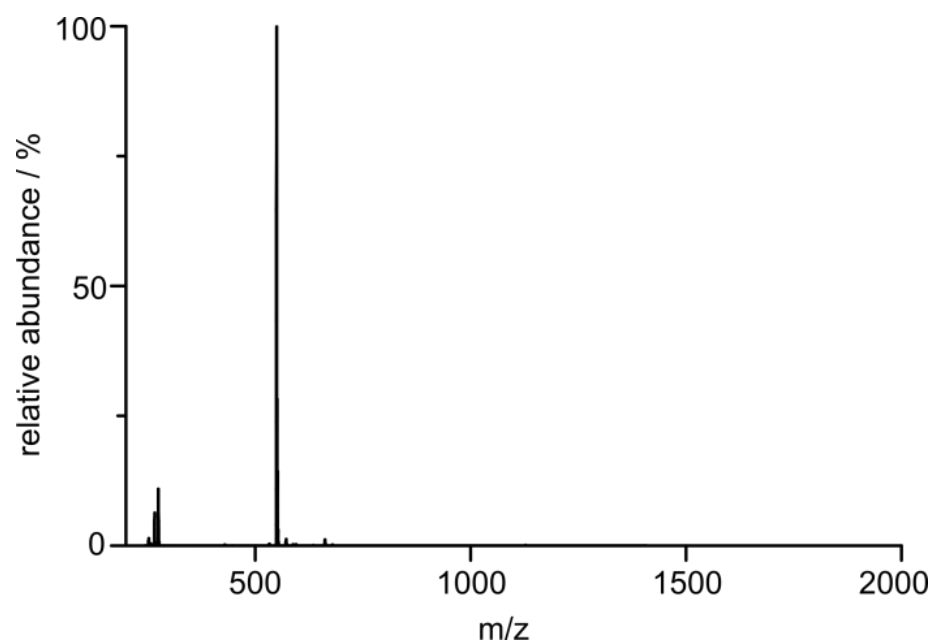

|            | m/z<br>calculated | m/z<br>found |
|------------|-------------------|--------------|
| $[M+1H]^+$ | 550.7             | 550.2        |

**Figure S8:** MS spectrum of reaction of biotinylated thiol (**B3C**) including calculated and found m/z signals.

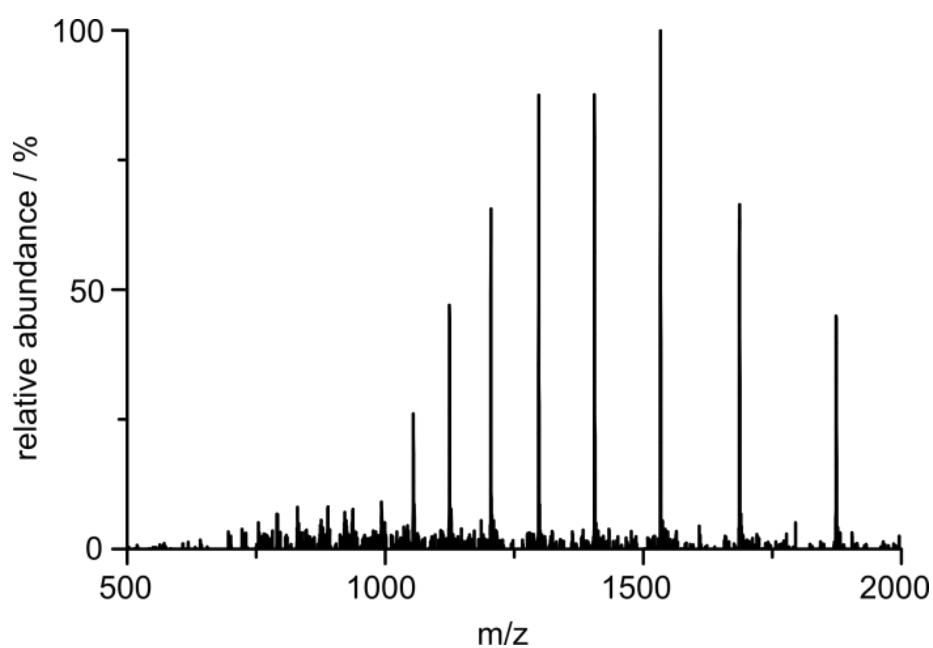

MW(**xS11**):      calculated = 16861.33 Da  
                          found = 16858.56 Da (deconvolution)

|                 | m/z<br>calculated | m/z<br>found |
|-----------------|-------------------|--------------|
| $[M+9H]^{+9}$   | 1874.48           | 1874.1       |
| $[M+10H]^{+10}$ | 1687.13           | 1686.7       |
| $[M+11H]^{+11}$ | 1533.85           | 1533.7       |
| $[M+12H]^{+12}$ | 1406.11           | 1405.7       |
| $[M+13H]^{+13}$ | 1298.03           | 1297.8       |
| $[M+14H]^{+14}$ | 1205.38           | 1205.2       |
| $[M+15H]^{+15}$ | 1125.09           | 1124.9       |
| $[M+16H]^{+16}$ | 1054.83           | 1054.8       |

**Figure S9:** MS spectrum of **xS11** purified by scavenger-based pulldown (Strategy I) including calculated and found m/z signals.

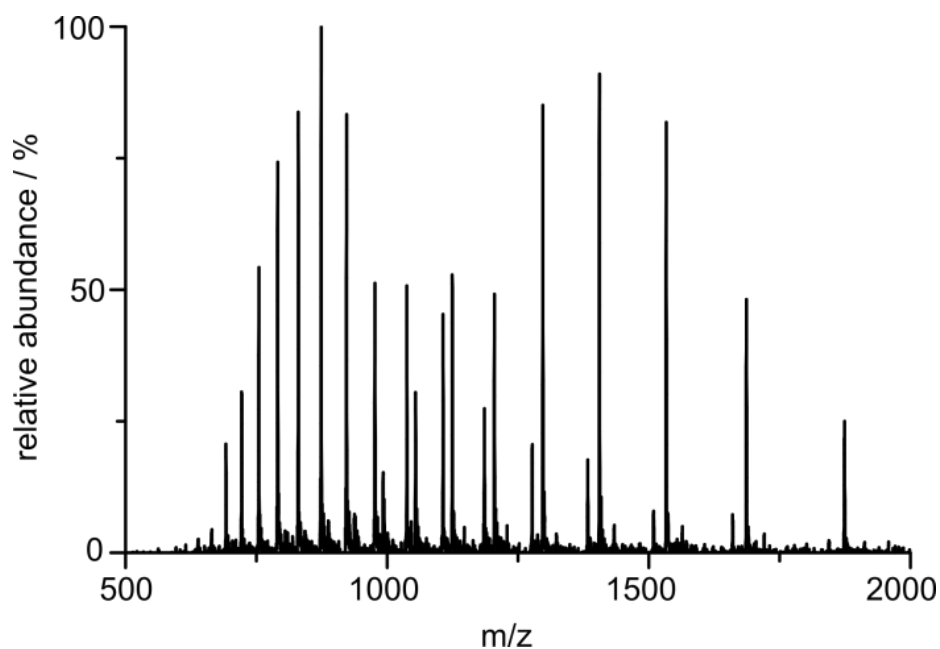

MW(**S11**):     calculated = 16594.98 Da  
                   found = 16592.42 Da (deconvolution)

MW(**xS11**)    calculated = 16861.33 Da  
                   found = 16859.55 Da (deconvolution)

|                        | <b>S11</b>        |              | <b>xS11</b>       |              |
|------------------------|-------------------|--------------|-------------------|--------------|
|                        | m/z<br>calculated | m/z<br>found | m/z<br>calculated | m/z<br>found |
| [M+9H] <sup>+9</sup>   |                   |              | 1874.48           | 1874.5       |
| [M+10H] <sup>+10</sup> |                   |              | 1687.13           | 1687.1       |
| [M+11H] <sup>+11</sup> |                   |              | 1533.85           | 1533.6       |
| [M+12H] <sup>+12</sup> |                   |              | 1406.11           | 1406.0       |
| [M+13H] <sup>+13</sup> | 1277.54           | 1277.5       | 1298.03           | 1297.9       |
| [M+14H] <sup>+14</sup> | 1186.36           | 1186.2       | 1205.38           | 1205.2       |
| [M+15H] <sup>+15</sup> | 1107.33           | 1107.2       | 1125.09           | 1124.9       |
| [M+16H] <sup>+16</sup> | 1038.19           | 1038.1       | 1054.83           | 1054.6       |
| [M+17H] <sup>+17</sup> | 977.18            | 977.1        | 922.84            | 992.6        |
| [M+18H] <sup>+18</sup> | 922.94            | 922.8        |                   |              |
| [M+19H] <sup>+19</sup> | 874.42            | 874.3        |                   |              |
| [M+20H] <sup>+20</sup> | 830.75            | 830.7        |                   |              |
| [M+21H] <sup>+21</sup> | 791.24            | 794.1        |                   |              |
| [M+22H] <sup>+22</sup> | 755.32            | 755.2        |                   |              |
| [M+23H] <sup>+23</sup> | 722.52            | 722.4        |                   |              |
| [M+24H] <sup>+24</sup> | 692.46            | 692.3        |                   |              |

**Figure S10:** MS spectrum of incomplete reaction of **S11** with Ae2 including calculated and found m/z signals.

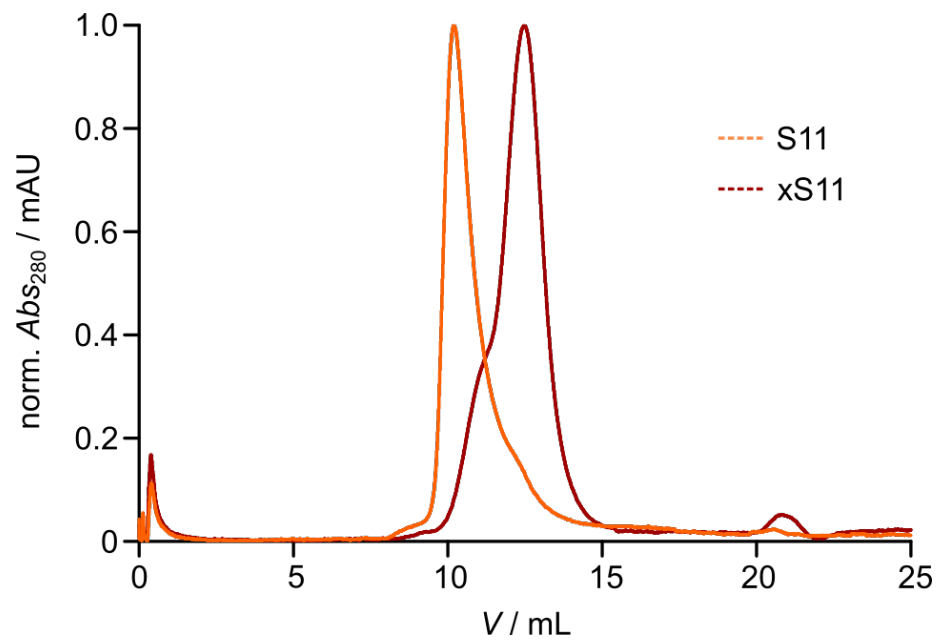

**Figure S11:** Overlay of normalized SEC chromatograms of **S11** and **xS11** in denaturing SEC using 2.5 M urea. A shift in retention by unfolding between **S11** and **xS11** enables the separation of the two molecules.

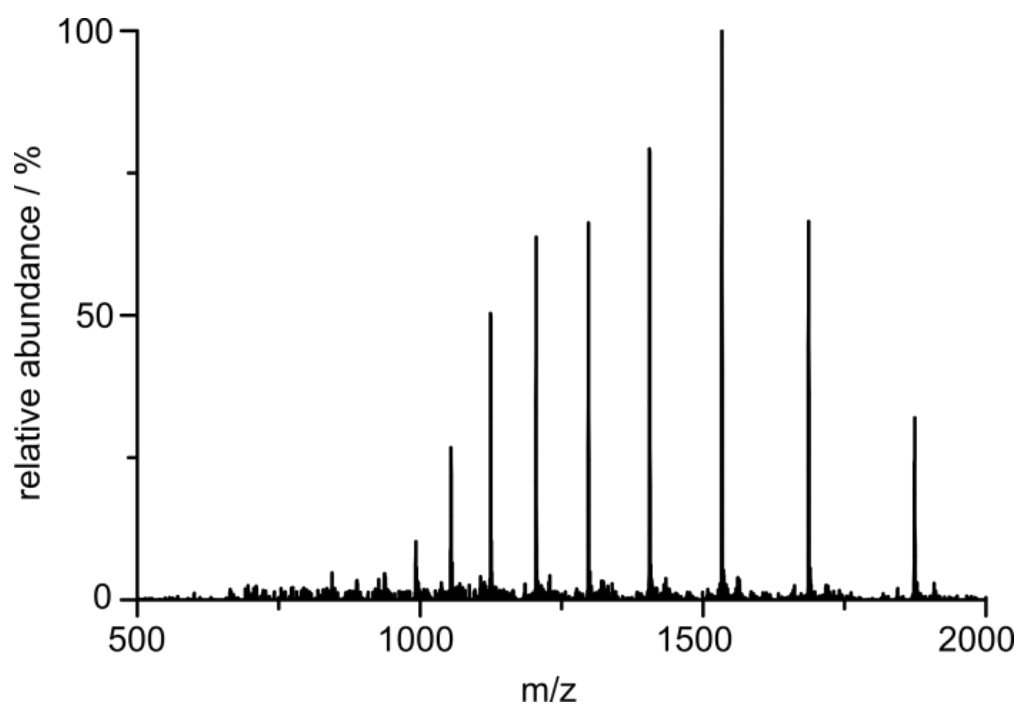

MW(xS11): calculated = 16861.33 Da  
found = 16859.50 Da (deconvolution)

|                 | m/z<br>calculated | m/z<br>found |
|-----------------|-------------------|--------------|
| $[M+9H]^{+9}$   | 1874.48           | 1874.4       |
| $[M+10H]^{+10}$ | 1687.13           | 1687.0       |
| $[M+11H]^{+11}$ | 1533.85           | 1533.7       |
| $[M+12H]^{+12}$ | 1406.11           | 1405.8       |
| $[M+13H]^{+13}$ | 1298.03           | 1298.0       |
| $[M+14H]^{+14}$ | 1205.38           | 1205.2       |
| $[M+15H]^{+15}$ | 1125.09           | 1124.9       |
| $[M+16H]^{+16}$ | 1054.83           | 1054.8       |
| $[M+17H]^{+17}$ | 992.48            | 993.6        |

**Figure S10:** MS spectrum of xS11 purified by denaturing SEC (Strategy B) including calculated and found m/z signals.

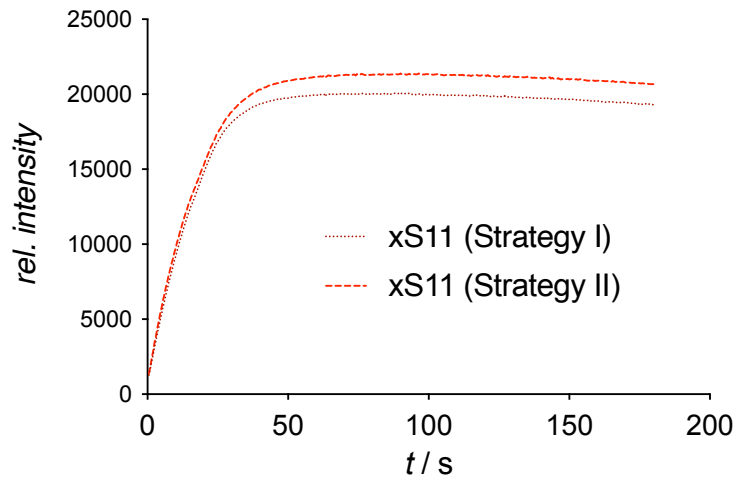

**Figure S13:** Fluorescence-based readout of transpeptidase activity of **xS11** purified by both strategies (biotin pulldown and denaturing size exclusion) under unstressed conditions. 2  $\mu\text{M}$  protein was mixed with 20  $\mu\text{M}$  probe and 2 mM triglycine (H-GGG-OH). Increase in FITC fluorescence was measured over time in a plate reader.

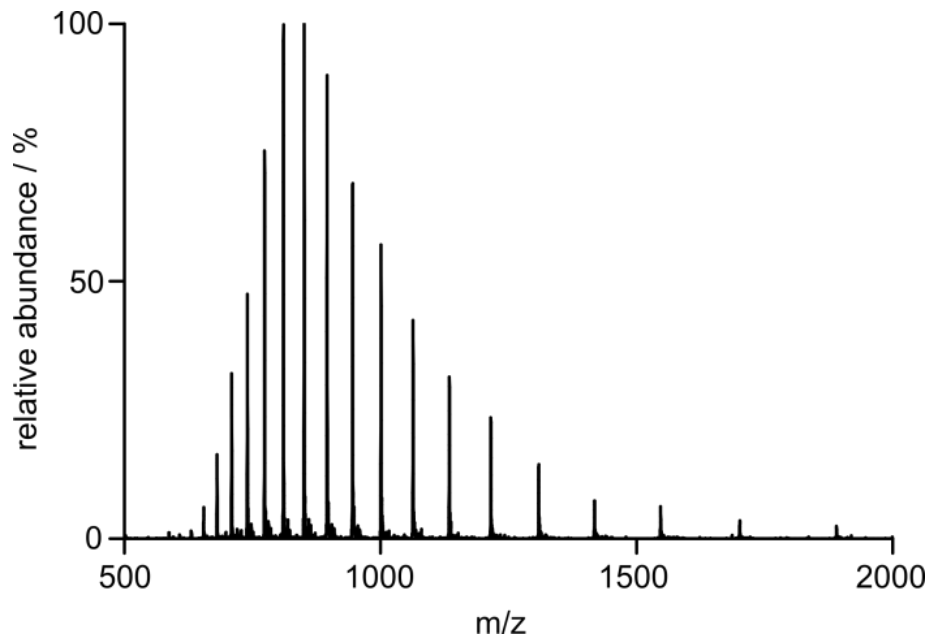

MW(SrtA):      calculated = 17009.27 Da  
                   found = 17007.39 Da (deconvolution)

|                        | MS-ions<br>calculated | MS-ions<br>found |
|------------------------|-----------------------|------------------|
| [M+11H] <sup>+11</sup> | 1547.30               | 1547.2           |
| [M+12H] <sup>+12</sup> | 1418.44               | 1418.4           |
| [M+13H] <sup>+13</sup> | 1309.41               | 1309.2           |
| [M+14H] <sup>+14</sup> | 1215.95               | 1215.8           |
| [M+15H] <sup>+15</sup> | 1134.95               | 1134.9           |
| [M+16H] <sup>+16</sup> | 1064.08               | 1064.0           |
| [M+17H] <sup>+17</sup> | 1001.55               | 1001.4           |
| [M+18H] <sup>+18</sup> | 945.96                | 945.9            |
| [M+19H] <sup>+19</sup> | 896.22                | 896.2            |
| [M+20H] <sup>+20</sup> | 851.46                | 851.4            |
| [M+21H] <sup>+21</sup> | 810.97                | 810.9            |
| [M+22H] <sup>+22</sup> | 774.15                | 774.1            |
| [M+23H] <sup>+23</sup> | 740.53                | 740.4            |
| [M+24H] <sup>+24</sup> | 709.72                | 709.7            |
| [M+25H] <sup>+25</sup> | 681.37                | 681.3            |

**Figure S14:** MS spectrum of **SrtA** including calculated and found m/z signals.

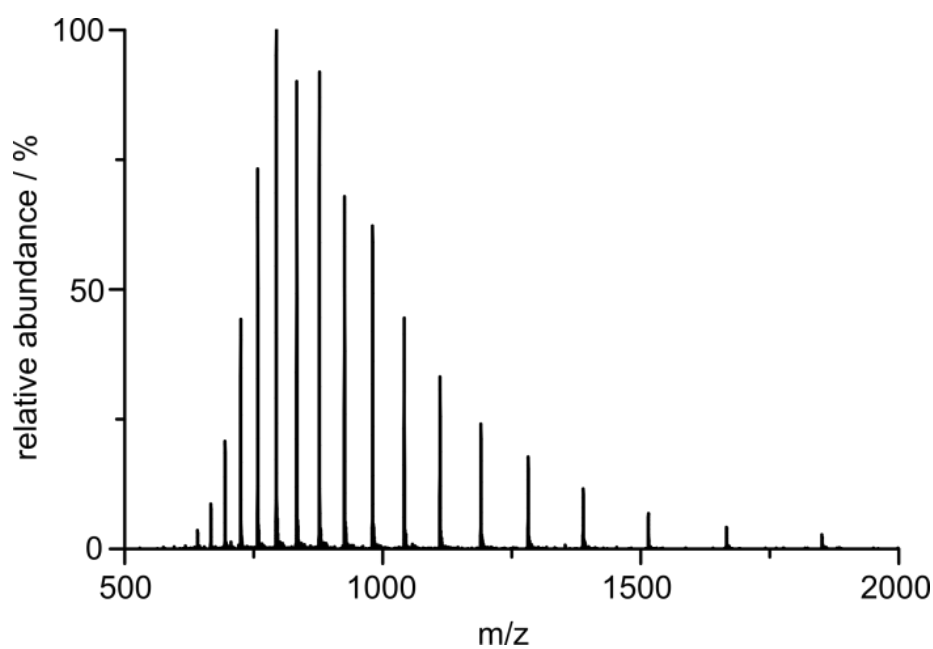

MW(**8M**):      calculated = 16657.94 Da  
                       found = 16655.92 Da (deconvolution)

|                        | m/z<br>calculated | m/z<br>found |
|------------------------|-------------------|--------------|
| [M+11H] <sup>+11</sup> | 1515.36           | 1515.2       |
| [M+12H] <sup>+12</sup> | 1389.16           | 1389.0       |
| [M+13H] <sup>+13</sup> | 1282.38           | 1282.4       |
| [M+14H] <sup>+14</sup> | 1190.85           | 1190.7       |
| [M+15H] <sup>+15</sup> | 1111.53           | 1111.4       |
| [M+16H] <sup>+16</sup> | 1042.12           | 1042.1       |
| [M+17H] <sup>+17</sup> | 980.88            | 980.8        |
| [M+18H] <sup>+18</sup> | 926.44            | 926.3        |
| [M+19H] <sup>+19</sup> | 877.73            | 877.6        |
| [M+20H] <sup>+20</sup> | 833.90            | 833.9        |
| [M+21H] <sup>+21</sup> | 794.24            | 794.2        |
| [M+22H] <sup>+22</sup> | 758.18            | 758.1        |
| [M+23H] <sup>+23</sup> | 725.26            | 725.2        |
| [M+24H] <sup>+24</sup> | 695.08            | 694.8        |
| [M+25H] <sup>+25</sup> | 667.32            | 667.3        |

**Figure S15:** MS spectrum of **8M** including calculated and found m/z signals.



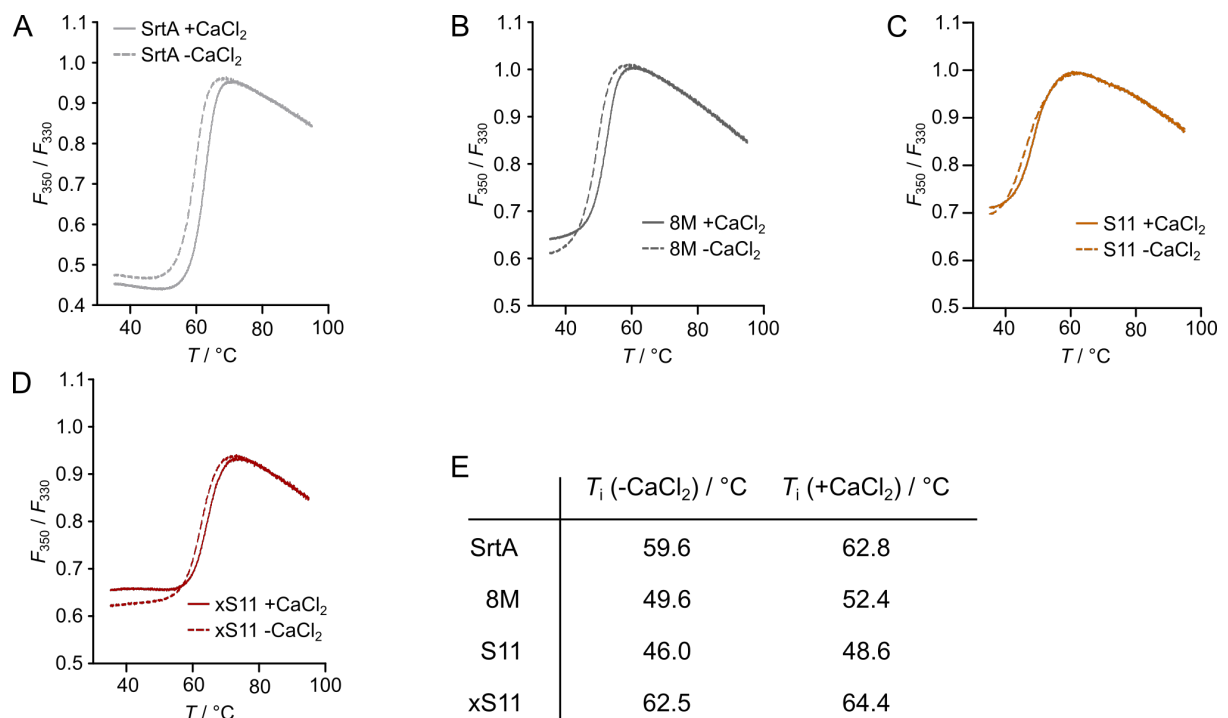

**Figure S16:** Melting curves of **SrtA**, **8M**, **S11** and **xS11** determined by nanoDSF. Protein ( $c = 5\text{--}10\ \mu\text{M}$ ) was used in a buffer with and without 5 mM CaCl<sub>2</sub> and the change in  $F_{350}/F_{330}$  ratio was monitored in the range of 30–95 °C. Melting temperatures ( $T_i$ ) are an average of triplicate measurements.

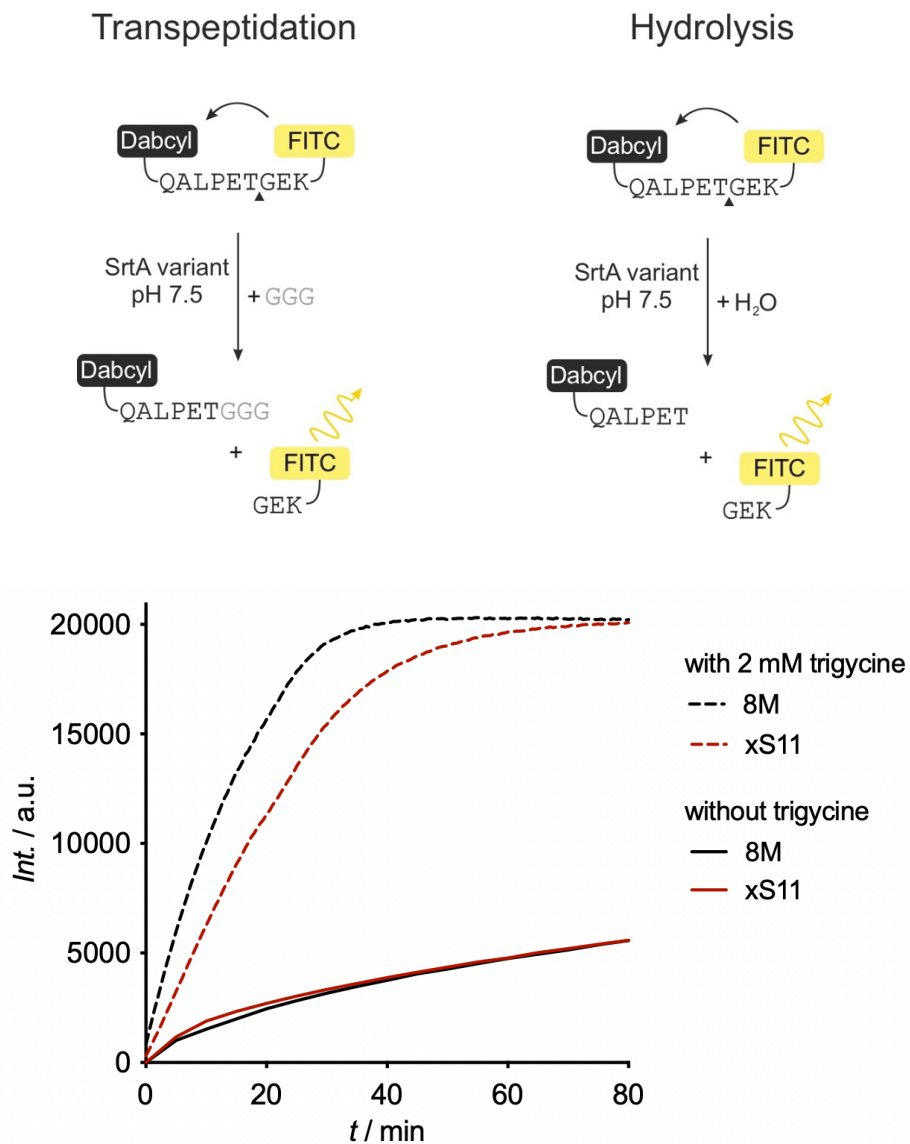

**Figure S11:** Top: Scheme for Sortase-mediated reaction of probe with triglycine (transpeptidation) and water (hydrolysis). Bottom: Fluorescence intensity measurement of enzymatic reaction performed in the absence (solid line) and the presence of triglycine ( $c = 2$  mM, dashed line).

**A) Peak  $t_r = 10.3$  min: substrate (a)**

MW(calculated) = 1612.73 Da

|               | m/z<br>calculated | m/z<br>found |
|---------------|-------------------|--------------|
| $[M+2H]^{+2}$ | 807.37            | 806.6        |
| $[M+3H]^{+3}$ | 538.58            | 538.0        |

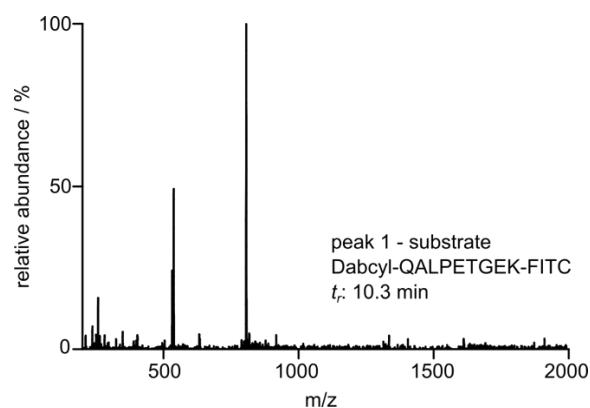

**B) Peak  $t_r = 9.4$  min: product I (b)**

MW(calculated) = 1080.17 Da

|               | m/z<br>calculated | m/z<br>found |
|---------------|-------------------|--------------|
| $[M+1H]^{+1}$ | 1081.17           | 1080.6       |
| $[M+2H]^{+2}$ | 541.09            | 540.9        |

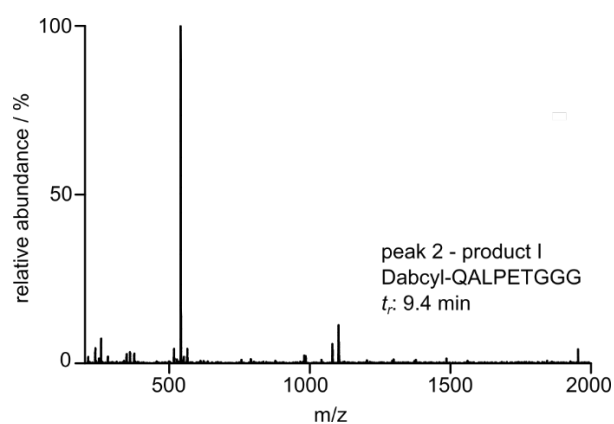

**C) Peak  $t_r = 7.8$  min: product II (c)**

MW(calculated) = 721.74 Da

|               | m/z<br>calculated | m/z<br>found |
|---------------|-------------------|--------------|
| $[M+1H]^{+1}$ | 722.74            | 721.1        |
| $[M+2H]^{+2}$ | 361.87            | 361.2        |

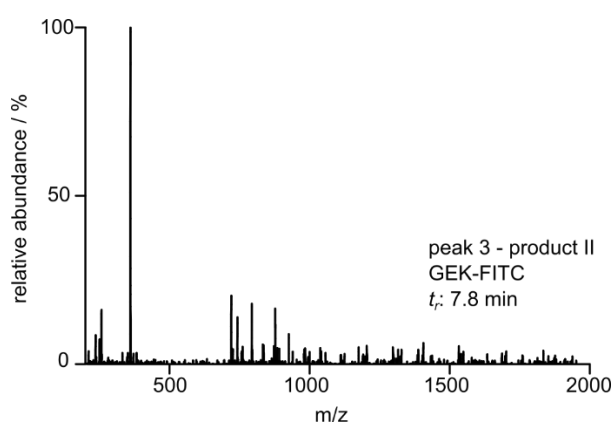

**Figure S12:** xS11 transpeptidase reaction under denaturing conditions. MS spectrum of substrate (a), product I (b) and product II (c) of the labelled peptide probe analyzed by HPLC-MS including calculated and found masses.

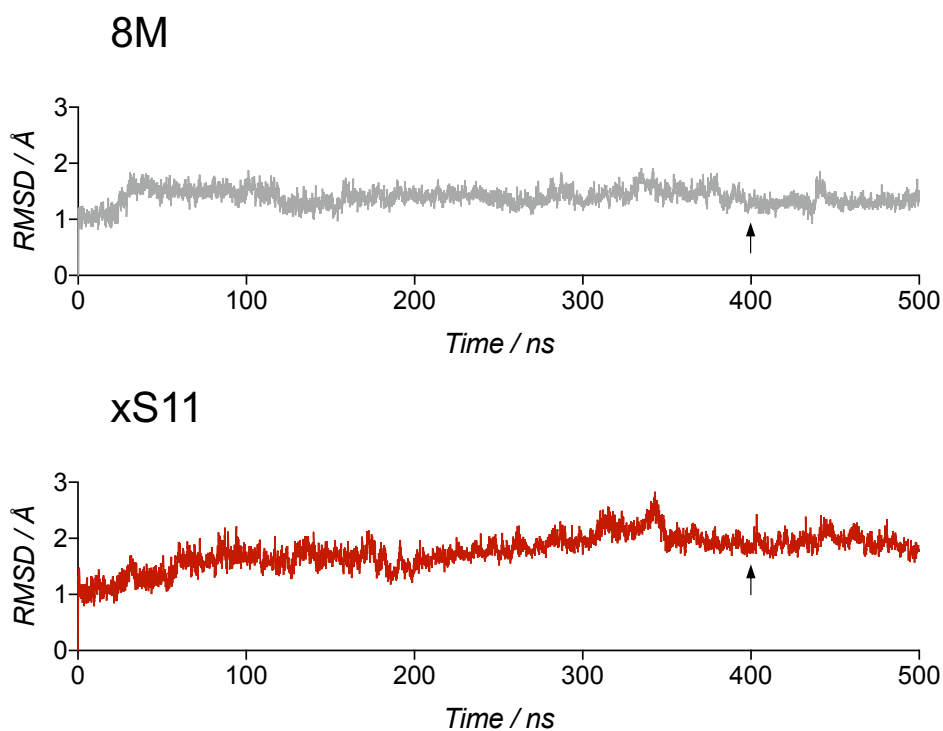

**Figure S19:** Sortase variants **8M** and cross-linked **xS11** were equilibrated extensively by a 500 ns molecular dynamics simulation to ensure complete minimization of the modified structures. Backbone atom ( $C\alpha+C+N$ ) RMSD values for non-terminal residues (71–202) are displayed, excluding the flexible termini. A structural snapshot (indicated) for both 8M and xS11 was used for subsequent MD simulations and analysis (Figure 4 and Supplementary Figure 19). Snapshots coordinates are available as Supplementary Information).

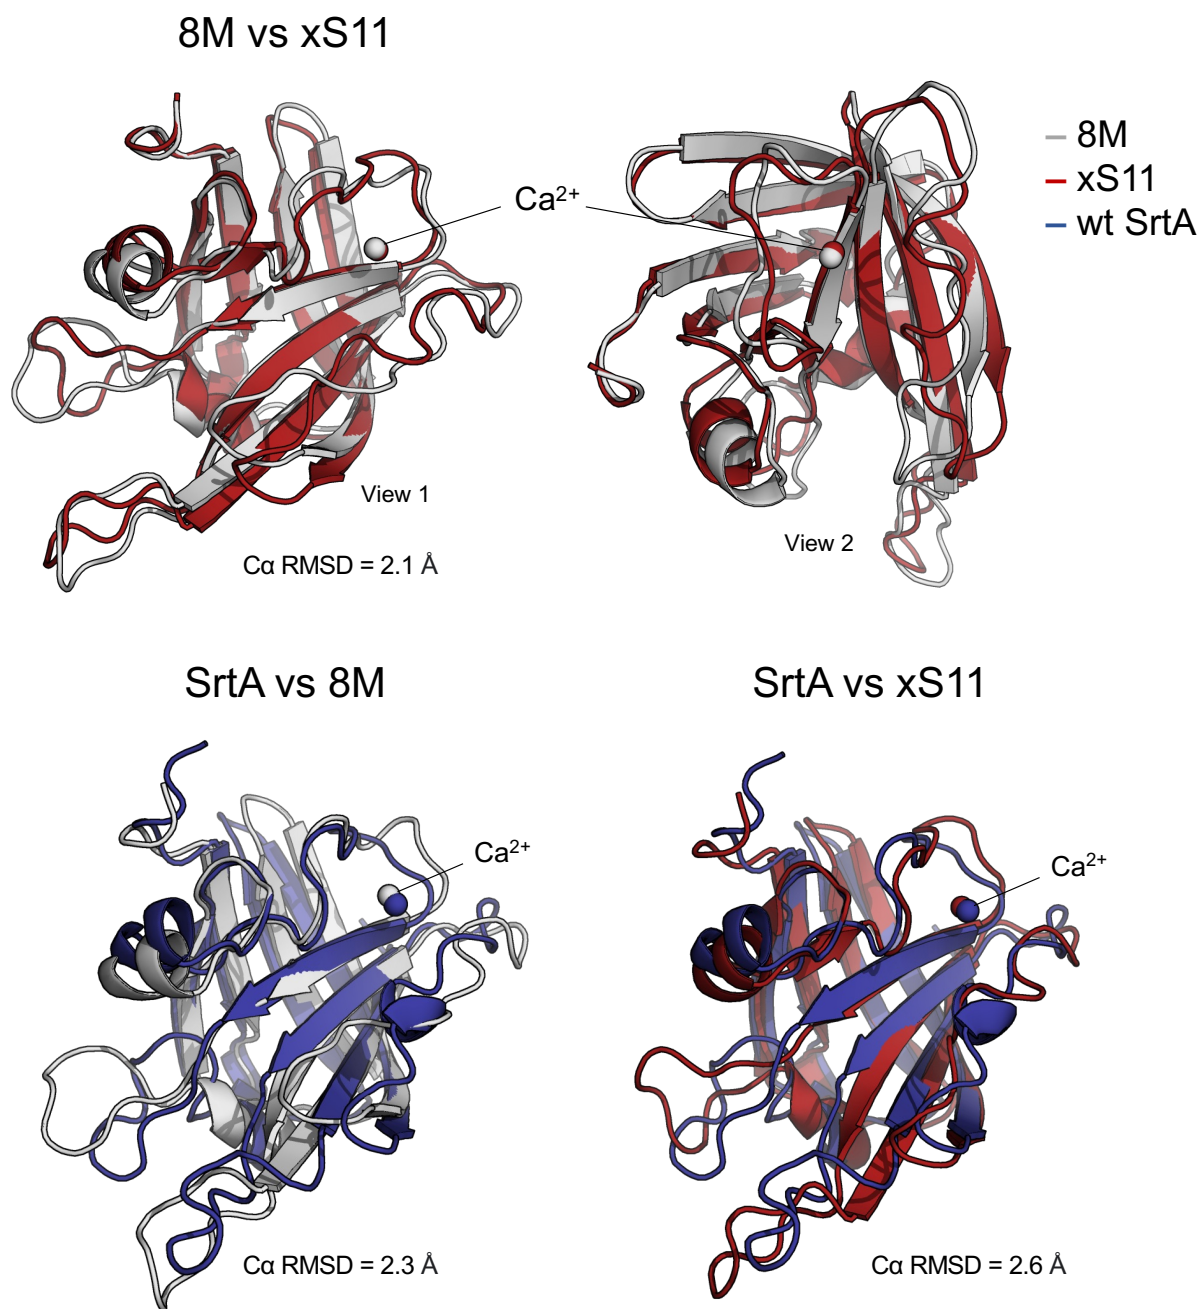

**Figure S20:** The tertiary structures of **8M** (grey) and **xS11** (red) do not deviate significantly relative to the NMR structure of wt SrtA (blue, PDB ID = 2KID). Equilibrated structures of **8M** and **xS11** represent the 400 ns snapshot of the above 500 ns simulation (Supplementary Figure S18). RMSD values indicate carbon-alpha deviations of residues 71–202, demonstrating some variation relative to the wild-type SrtA structure due to loop rearrangements (RMSD 2–3 Å), whilst the core secondary structure remains constant. The calcium position is nearly identical for 8M and crosslinked **xS11** - within 0.2 Å between these two snapshots.

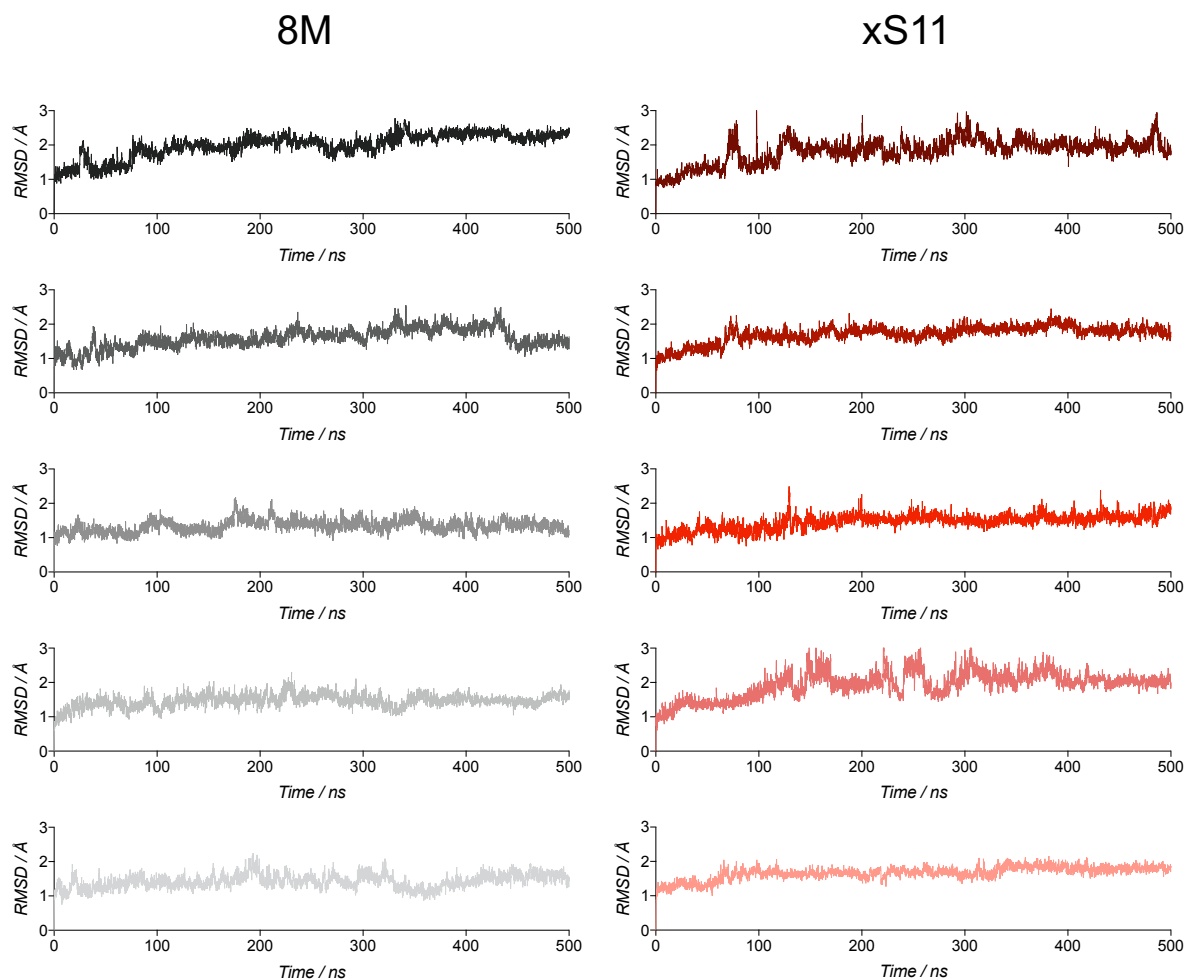

**Figure S21:** (A) Backbone atom ( $C\alpha$ , C, N) RMSD values relative to the equilibrated structures (Supplementary Figure 18) for sortase variants **8M** (left) and **xS11** (right) over the course of five replicate 500 ns molecular dynamics trajectories. RMSD values are calculated for all non-terminal residues (71–202). Consistently stable trajectories for both un-crosslinked and crosslinked variants suggested adequate equilibration of the two models within the MD forcefield, enabling analysis of protein flexibility under native conditions (Figure 4).
